# Supplementary material
Source: Springer Nature journal article supplement (https://www.springermedizin.de/resource/supplementary/12871_2014_326_MOESM2_ESM.pdf/9429108)

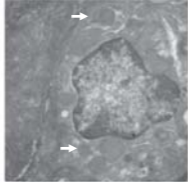

**control**

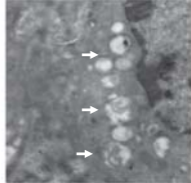

**LPS**

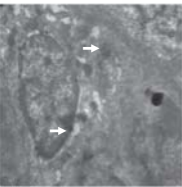

**L**

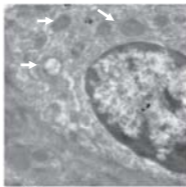

**M**

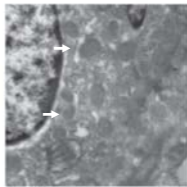

**H**

Supplement: MOESM2 [file 9429108]
